# Supplementary material for: Controllable modulation of the oxygen vacancy-induced adjustment of memristive behavior for direct differential operation with transistor-free memristor
Source: Royal Society of Chemistry journal article supplement (doi:10.1039/d3nr02395h), 2023-01-01
Supplement: d3nr02395h1.pdf [file d3nr02395h1.pdf]

## Supplementary Materials

# Controllable Modulation of Oxygen Vacancies Induced Adjustment of Memristive Behavior for Direct Differential Operation with Transistor-free Memristor

*Qin Xie<sup>a</sup>, Xinqiang Pan<sup>a,b,\*</sup>, Wenbo Luo<sup>a,b</sup>, Yao Shuai<sup>a,b</sup>, Huizhong Zeng<sup>a</sup>, Jiejun Wang<sup>a</sup>, Yuting Liu<sup>a</sup>, Xudong Yang<sup>a</sup>, Lu Lv<sup>a</sup>, Jiaqi Xu<sup>a</sup>, Hao Yan<sup>b</sup>, Chuangui Wu<sup>a,b</sup>, Wanli Zhang<sup>a,b</sup>*

<sup>a</sup> State Key Laboratory of Electronic Thin Films and Integrated Devices, University of Electronic Science and Technology of China, Chengdu 611731, P. R. China

<sup>b</sup> Chongqing Institute of Microelectronics Industry Technology, UESTC, Chongqing 401332, P. R. China

\*E-mail: panxinqiang@uestc.edu.cn

**Supplementary Figures:**

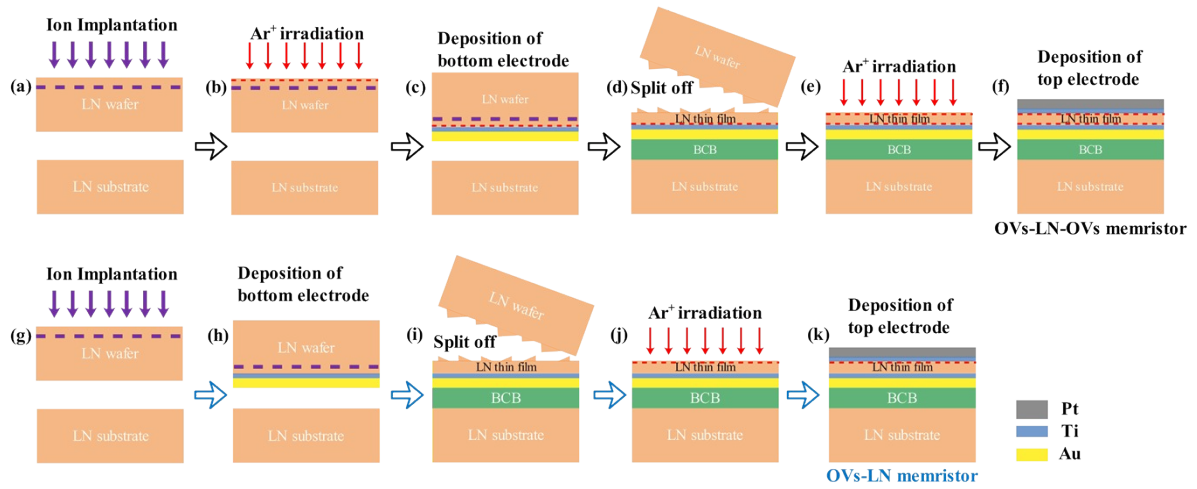

**Fig. S1** (a)-(f) A flowchart of the fabrication process of the OV-LN-OVs memristor. (g)-(k) A flowchart of the fabrication process of the OV-LN memristor.

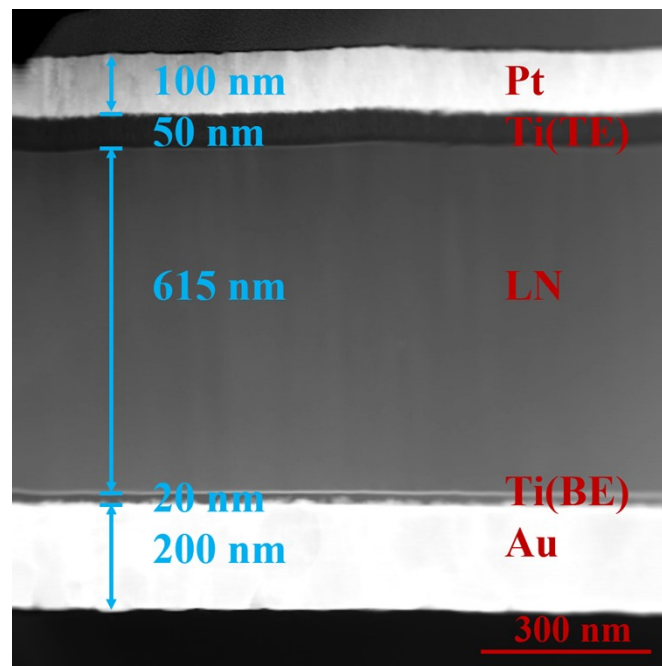

**Fig. S2** The cross-section SEM image of memristors.

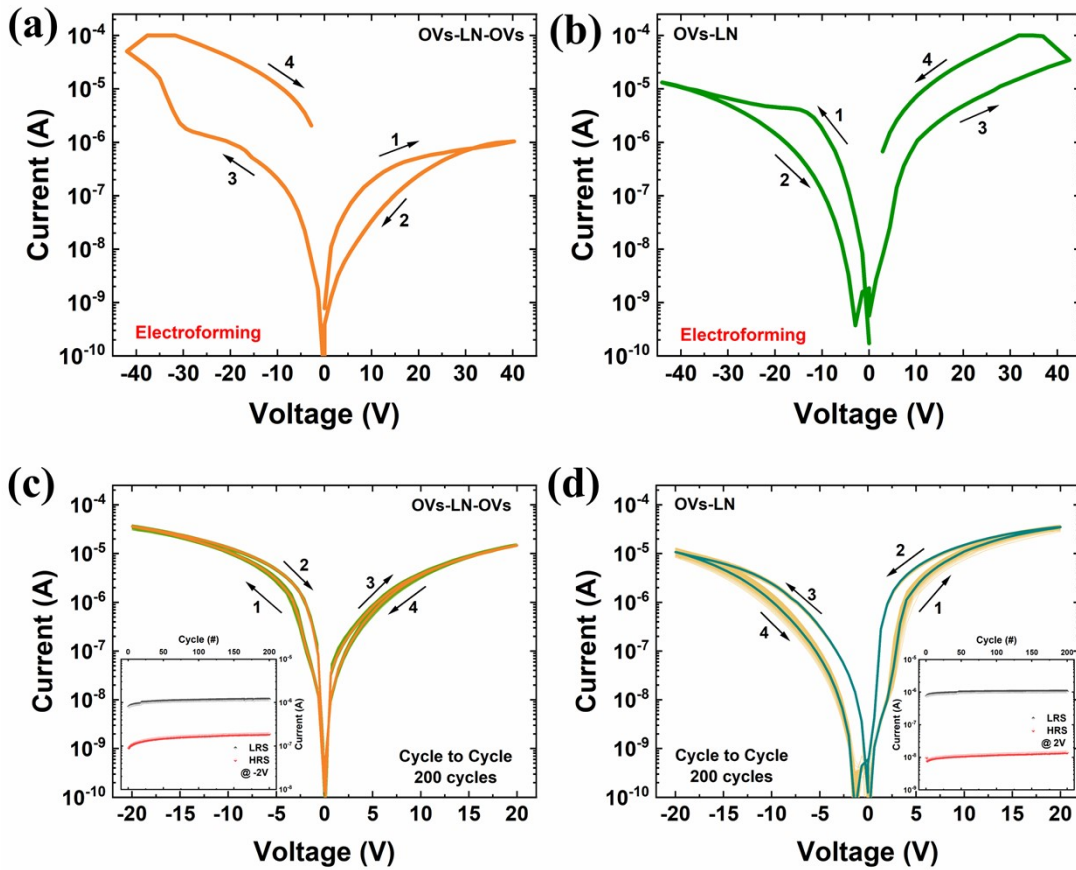

**Fig. S3** Electroforming process of (a) OV-LN-OVs memristor with the sequence of sweeping voltage of  $0\text{ V} \rightarrow +V_{max} \rightarrow 0\text{ V} \rightarrow -V_{max} \rightarrow 0\text{ V}$ . Electroforming process of (b) OV-LN memristor with the sequence of sweeping voltage of  $0\text{ V} \rightarrow -V_{max} \rightarrow 0\text{ V} \rightarrow +V_{max} \rightarrow 0\text{ V}$ . The sequence of sweeping voltage is opposite to the sweeping sequence of curves in manuscript (Fig. 1). The cycle-to-cycle test of (c) OV-LN-OVs memristor and (d) OV-LN memristor. Reproducibility of HRS and LRS of the two memristors during 200 cycles were inserted.

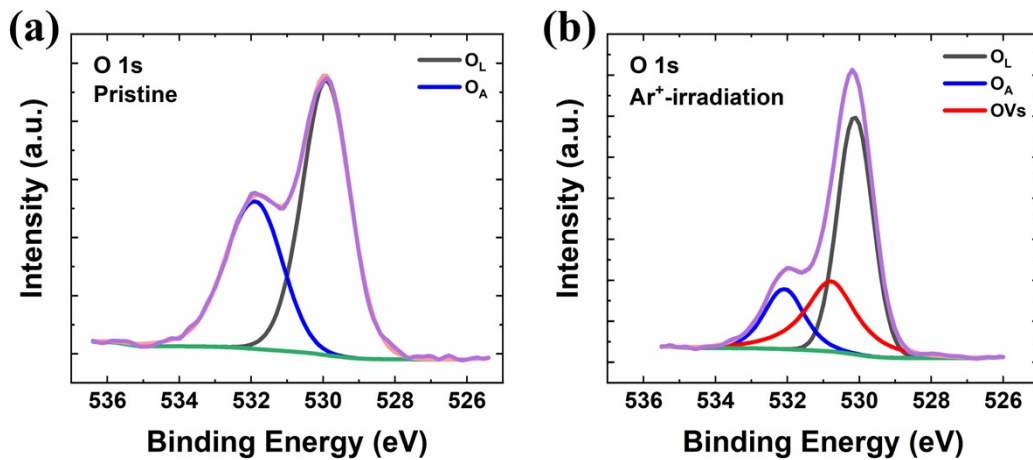

**Fig. S4** XPS of O1s on the surface of the (a) pristine single crystalline LN thin film, (b) single crystalline LN thin film irradiated by  $\text{Ar}^+$  at 80 eV for 60 min.

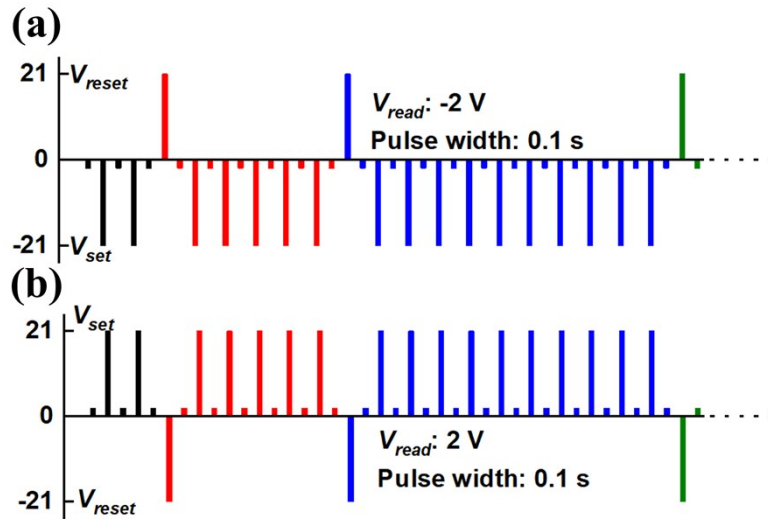

**Fig. S5** The schematic diagram of the sequence of voltage pulses used to test synaptic plasticity in (a) OV-LN-OV memristor and (b) OV-LN memristor.

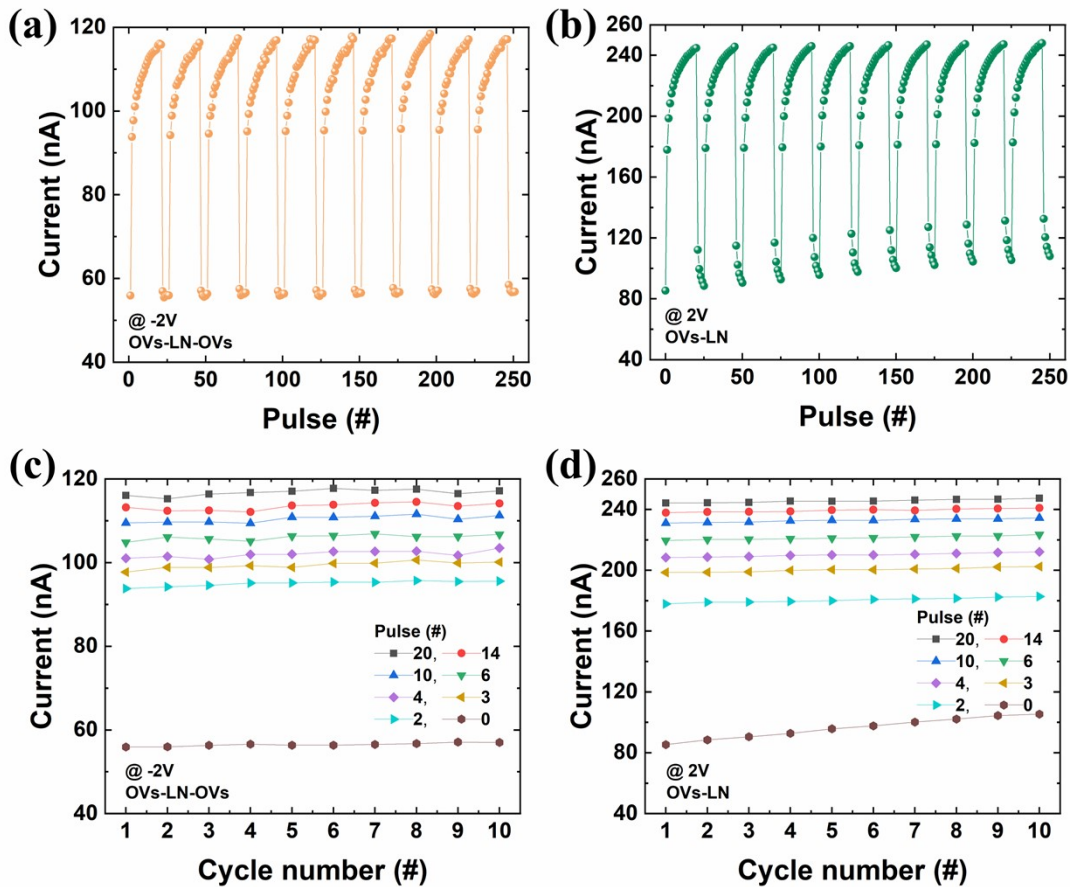

**Fig. S6** Cycle-to-cycle test of plasticity of (a) OV-LN-OV memristor and (b) OV-LN memristor. During each cycle, the voltage pulse sequence consists of 20 set voltage pulses and 5 reset voltage pulses, and pulse width is 0.1 s. The corresponding multi-RS of (c) OV-LN-OV memristor and (d) OV-LN memristor at each cycle during the cycle-to-cycle test.

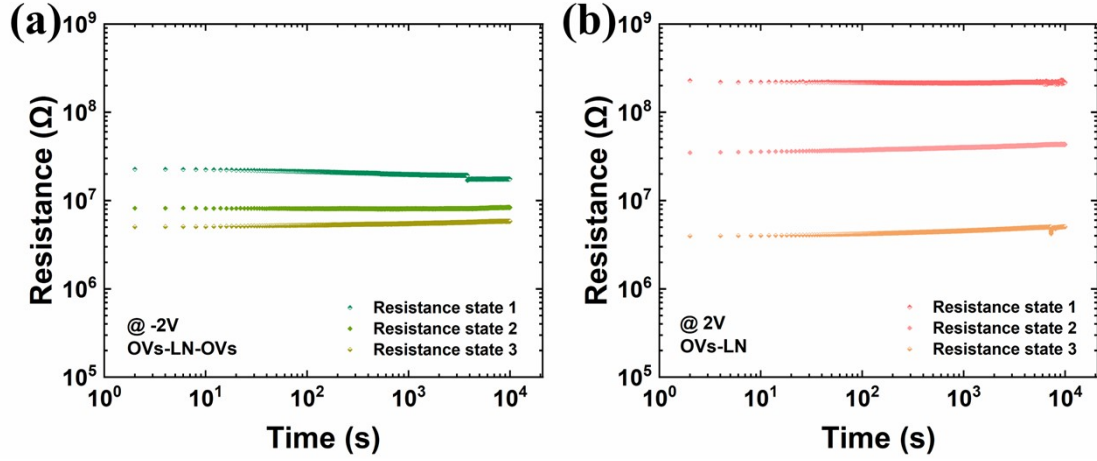

**Fig. S7** Resistance retention properties of (a) OV<sub>s</sub>-LN-OV<sub>s</sub> memristor, (b) OV<sub>s</sub>-LN memristor.

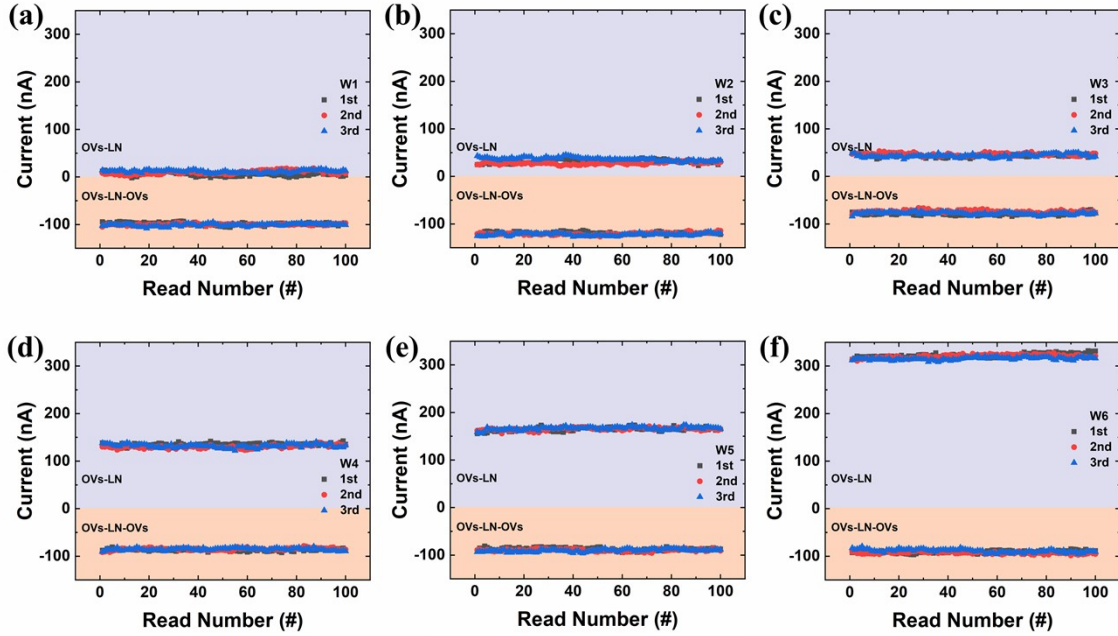

**Fig. S8** The current flowing through two memristors ( $I_{OV_s-LN}$  and  $I_{OV_s-LN-OV_s}$ ) during the differential operation to denote (a) W1, (b) W2, (c) W3, (d) W4, (e) W5 and (f) W6. In each differential operation,  $I_{OV_s-LN}$  and  $I_{OV_s-LN-OV_s}$  were measured for three times. In each measurement,  $I_{OV_s-LN}$  and  $I_{OV_s-LN-OV_s}$  were read for 100 times. The data in the lilac part represents  $I_{OV_s-LN}$ , and the data in the orange part represents  $I_{OV_s-LN-OV_s}$ .
